# Supplementary material for: Solutions for improved hospital-wide patient flows – a qualitative interview study of leading healthcare providers
Source: PubMed Central journal article supplement (PMC9825009; doi:10.1186/s12913-022-09015-w), 2023-01-07
Supplement: 12913_2022_9015_MOESM2_ESM.pdf [file 12913_2022_9015_MOESM2_ESM.pdf]

## Appendix B: Open coding of interviews

| Themes           | Solution Categories                                                                         | Open Interview Codes                                                                                                                                                                                                                                                                                                                                                                                                                                                                                                                                                                                                                                                                                                                                                                                                                                                                                                                                                                                                                                                                                                                                                                                                                                                                                                                                                                                                                                                                                                                                                                                                                                                                                                   |
|------------------|---------------------------------------------------------------------------------------------|------------------------------------------------------------------------------------------------------------------------------------------------------------------------------------------------------------------------------------------------------------------------------------------------------------------------------------------------------------------------------------------------------------------------------------------------------------------------------------------------------------------------------------------------------------------------------------------------------------------------------------------------------------------------------------------------------------------------------------------------------------------------------------------------------------------------------------------------------------------------------------------------------------------------------------------------------------------------------------------------------------------------------------------------------------------------------------------------------------------------------------------------------------------------------------------------------------------------------------------------------------------------------------------------------------------------------------------------------------------------------------------------------------------------------------------------------------------------------------------------------------------------------------------------------------------------------------------------------------------------------------------------------------------------------------------------------------------------|
| <b>Discharge</b> | Enable discharge predictability with more home care solutions and own downstream facilities | <p>A good home care solution is to have the hospital responsible 3 days, thereafter GPs</p> <p>A whole separate team handles the home care patients</p> <p>Build after care capacity to support hospital</p> <p>Build out home care possibility as it gives many good options to the hospital</p> <p>Build out home care to avoid bottlenecks with rehab or nursing facilities</p> <p>Have a good home care organization of nurses and physicians</p> <p>Home care can strengthen the care and the relationships</p> <p>Home care solutions - 10 nurses and doctors work in the team to see patients daily</p> <p>Home care solutions - hospital responsible for a week</p> <p>Home care solutions can finish IV antibiotics at home and require low nursing needs</p> <p>Hospital staff visit discharged patients in their home to release bed capacity</p> <p>Hospitals can cover the entire continuity of care</p> <p>Improve virtual care through in-home monitoring</p> <p>Inpatient team follows patients at home for continuity</p> <p>Invest in home care and cooperate between hospital, GPs and community</p> <p>Invest in own downstream facilities</p> <p>It is good to have much home care capacity</p> <p>Release bed capacity by supporting the patient back home</p> <p>Set up a camera to virtually see and monitor the patients in their homes</p> <p>Take more responsibility for after services</p> <p>The capacity of the hospital can increase if home care solutions are improved</p> <p>Use a designed home care program to facilitate change</p> <p>Use home care solutions to free up space and bypass after care services</p> <p>Work with home care to ease the burden on the hospital</p> |
|                  | Have dedicated discharge coordinators or coordinating teams                                 | <p>Case managers and social workers coordinate the outflow</p> <p>Case managers are right in the middle of the coordination of the discharges</p> <p>Case managers personnel help to plan for discharge</p> <p>Financial officers to support flow to ensure insurance companies are connected</p> <p>For discharge efficiency make physicians work as a part of the team</p> <p>Have multidisciplinary rounds every day with proactive case managers</p> <p>Operative direction coordinates discharge with after care</p> <p>Outflow care management team handles discharges</p> <p>Patient care coordinator responsible for discharges</p> <p>Smoother discharge processes by daily rounding structure with care coordinators</p> <p>Social assistant who coordinates after care</p> <p>Social worker and care coordinator responsible for patient's needs</p> <p>Social worker manages discharges to the home, case manager coordinates facility discharge</p> <p>Use coordination consultants in the discharge process to facilitate transfer</p> <p>Ward physician responsible for discharge flow</p>                                                                                                                                                                                                                                                                                                                                                                                                                                                                                                                                                                                                              |
|                  | Increase prioritization of discharge ready patients when planning procedures and activities | <p>Base MRI-radiology schedule on discharge readiness to expediate flow</p> <p>Discharge in early morning, teach in the afternoon</p> <p>Identify limiting step to discharge</p> <p>Milestone target perspective for each patient</p> <p>Physicians must prioritize discharges</p> <p>Prioritize discharge procedures</p> <p>Prioritize flow before severeness more often</p> <p>See if tests can be prioritized for discharge ready patients</p> <p>Smooth discharges by improving week-end procedures</p> <p>Strong daily focus on discharge ready identification</p> <p>Try to release discharge ready patients by prioritizing their last steps</p> <p>With real time data prioritize discharge ready patients at ancillary services</p>                                                                                                                                                                                                                                                                                                                                                                                                                                                                                                                                                                                                                                                                                                                                                                                                                                                                                                                                                                           |
|                  | Prioritize activities and organize staff to ensure early and efficient daily discharges     | <p>Deliver first week of medicine at inpatient pharmacy to expediate discharge</p> <p>Discharge before noon by changing morning routines</p> <p>Discharge before noon using KPIs</p> <p>Discharge directly from the recovery room</p> <p>Discharge lounge to free up beds for cleaning</p> <p>Discharge teams to meet every day to discuss and expediate discharge</p> <p>Encourage and incentivize morning discharges</p> <p>Give time and support to physicians to expediate discharge</p> <p>Have daily discharge synchronization</p> <p>Medication at discharge to avoid readmission or medication outside to improve flow</p> <p>The EHR automatically imports info to give a codified discharge summary</p> <p>Use a common medicine card for better discharge</p> <p>Use a discharge lounge at the ground floor for discharge ready patients</p>                                                                                                                                                                                                                                                                                                                                                                                                                                                                                                                                                                                                                                                                                                                                                                                                                                                                |
|                  | Provide follow up appointments at discharge to ensure accountability and continuity         | <p>Discharge team has access to outpatient schedule to schedule follow up appointment</p> <p>Follow-up appointment must be booked at discharge to avoid readmission</p> <p>Have standardized phonecalls with nurse practitioners after discharge to ensure medical quality</p> <p>Make sure there is a primary care appointment booked at discharge</p> <p>Provide follow-up appointments at discharge</p> <p>Provide tele consultations with patients in after care to avoid readmissions</p> <p>Receive follow-up information back home</p> <p>Social assistance will coordinate outpatient follow up at discharge</p> <p>Support discharges by offering a follow up video visits</p>                                                                                                                                                                                                                                                                                                                                                                                                                                                                                                                                                                                                                                                                                                                                                                                                                                                                                                                                                                                                                                |

| Themes           | Solution Categories                                                                        | Open Interview Codes                                                                                                                                                                                                                                                                                                                                                                                                                                                                                                                                                                                                                                                                                                                                                                                                                                                                                                                                                                                                                                              |
|------------------|--------------------------------------------------------------------------------------------|-------------------------------------------------------------------------------------------------------------------------------------------------------------------------------------------------------------------------------------------------------------------------------------------------------------------------------------------------------------------------------------------------------------------------------------------------------------------------------------------------------------------------------------------------------------------------------------------------------------------------------------------------------------------------------------------------------------------------------------------------------------------------------------------------------------------------------------------------------------------------------------------------------------------------------------------------------------------------------------------------------------------------------------------------------------------|
| <b>Discharge</b> | Request and work towards increased responsibility from after care services                 | <p>Community has responsibility to find after care solution</p> <p>Downstream actor accept patients when hospital needs it</p> <p>Downstream actor must have peak-surge capacity</p> <p>Good to have federal coordination of after care</p> <p>Incentivize downstream transfer by giving fines to after care if long transfer lead times</p> <p>Legislation to incentivize discharge</p> <p>More capacity is needed in after care for complex patients that need facility discharge</p> <p>Need for more downstream capacity</p> <p>There is a shortage of available capacity at the facilities outside the hospital</p>                                                                                                                                                                                                                                                                                                                                                                                                                                          |
|                  | Set early discharge goals and work towards them along the patients' whole hospital journey | <p>Create pre-visibility of estimated day of discharge</p> <p>Early after care involvement - week ahead probability of patient discharge</p> <p>EDD follow up to provide early discharge information to after care</p> <p>Estimate day of discharge and work towards that metric</p> <p>Every department at hospital estimates day of discharge of their patients</p> <p>Have entire team focusing on reaching EDD</p> <p>Improving EDD by statistics feedback</p> <p>Organize care team to meet discharge goal</p> <p>Plan for a specific day of discharge and give feedback on the results</p> <p>Start planning discharge early, based on estimated day of discharge</p> <p>Try to get a picture of when patients will be discharged and follow up on that and measure</p> <p>Use better tools and technologies to standardize the internal discharge process</p> <p>Use data analytics to help physicians becoming better at estimating day of discharge</p> <p>Visualize day of discharge in EHR so everyone sees and understands the process</p>            |
|                  | Share objectives, information and real time capacity data with after care services         | <p>Align objectives with after care through regular meetings on needs and quality</p> <p>Annual convention with after care on patient flow</p> <p>Build good relationships with after care</p> <p>Coordinate closely with a selected group of rehab centers, nursing homes and nursing facilities</p> <p>Have a clear transfer of accountability to after care</p> <p>Have good electronic communication with after care</p> <p>It is necessary to have good relationships with after care services</p> <p>Mutual agreement with after care on patient care chains</p> <p>Occupancy data sharing between hospital and after care</p> <p>Partnership with after care services</p> <p>Share medical records with after care services</p> <p>The most important thing is to have a good relationship with the players who take over the patient</p> <p>Try to understand each other - after care and hospital</p> <p>Use a discharge summary for chain of accountability</p> <p>Work closely with managers of rehabilitation to find good solutions for patients</p> |
|                  | Use mutual staffing collaboration between the hospital and after care services             | <p>After care has offices and staff at the hospital</p> <p>Build closer relationships by staffing nursing facilities for coordination</p> <p>Have nurse practitioners who frequently visit nursing facilities</p> <p>Nurses from public after care service are present at the hospital for coordination</p> <p>Send nurses and doctors with patient to give relief to after care</p> <p>Staff nursing facilities for better coordination</p> <p>Use hospital staff at nursing facilities</p> <p>Use outgoing teams to after care</p> <p>Work with nurse to nurse hand off with after care</p> <p>Work with physician to physician hand off with after care</p>                                                                                                                                                                                                                                                                                                                                                                                                    |

| Themes                   | Solution Categories                                                                          | Open Interview Codes                                                                                                                                                                                                                                                                                                                                                                                                                                                                                                                                                                                                                                                                                                                                                                                                                                                                                                                                                                                                                                                                                |
|--------------------------|----------------------------------------------------------------------------------------------|-----------------------------------------------------------------------------------------------------------------------------------------------------------------------------------------------------------------------------------------------------------------------------------------------------------------------------------------------------------------------------------------------------------------------------------------------------------------------------------------------------------------------------------------------------------------------------------------------------------------------------------------------------------------------------------------------------------------------------------------------------------------------------------------------------------------------------------------------------------------------------------------------------------------------------------------------------------------------------------------------------------------------------------------------------------------------------------------------------|
| <b>Healthcare sector</b> | Create healthcare system alignment with clear goals and objectives for each healthcare actor | <p>A more jointly coordinated health system is needed</p> <p>Common patient goals between all healthcare actors</p> <p>Create a patient centric care across all healthcare actors</p> <p>Create a systemness to the healthcare system</p> <p>Crisp task descriptions for primary care, hospital and after care</p> <p>Policy makers must understand the costs coming with having peak time capacity</p> <p>Politicians must support the investment of more ICU beds to avoid overcrowding and bottlenecks</p>                                                                                                                                                                                                                                                                                                                                                                                                                                                                                                                                                                                       |
|                          | Increase the staffing resources across the whole healthcare system                           | <p>After care services are understaffed, hospitals are understaffed, primary care is understaffed</p> <p>Find ways to deal with staffing shortages</p> <p>Healthcare needs more staffing resources</p> <p>If we do not have enough staff it does not matter if we improve our processes</p> <p>More specialist nurses are needed in many different areas</p> <p>More staffing resources are needed across the whole system</p> <p>Our staffing resources must increase for us to speed up the flow of patients</p> <p>The bottlenecks are very often associated to staffing shortages</p> <p>The hospital as well as after care services must increase the staffing</p> <p>To improve the flow we must employ more nurses</p> <p>We must both find ways to work with less staff but people are simultaneously very important</p> <p>We must educate and employ many more nurses in the whole healthcare sector</p> <p>We must find ways to deal with the staffing shortages even if it is hard</p> <p>We suffer from chronic staffing shortages and it really has an effect on the patient flow</p> |

| Themes | Solution Categories                                                                                     | Open Interview Codes                                                                                                                                                                                                                                                                                                                                                                                                                                                                                                                                                                                                                                                                                                                                                                                                                                                                                                                                                                                                                                                                                                                                                                           |
|--------|---------------------------------------------------------------------------------------------------------|------------------------------------------------------------------------------------------------------------------------------------------------------------------------------------------------------------------------------------------------------------------------------------------------------------------------------------------------------------------------------------------------------------------------------------------------------------------------------------------------------------------------------------------------------------------------------------------------------------------------------------------------------------------------------------------------------------------------------------------------------------------------------------------------------------------------------------------------------------------------------------------------------------------------------------------------------------------------------------------------------------------------------------------------------------------------------------------------------------------------------------------------------------------------------------------------|
| Entry  | Capability to reroute less severe ED patients to other types of care                                    | <p>Admission discussed with flow officer to look for alternative routes</p> <p>Analyse demand to avoid admissions by rerouting patients to more appropriate settings</p> <p>Close communication with outpatient clinics to avoid physicians sending patients to the ED</p> <p>Have a system to support planned acute surgeries</p> <p>Invest in front end tools and use pathways to shape demand and avoid ED admittance</p> <p>Prevent less severe acute patients from coming by changing incentives</p> <p>Redirect less severe ED patients to outpatient locations and inform primary care</p> <p>Transfer less severe ED patients to outpatient appointment</p>                                                                                                                                                                                                                                                                                                                                                                                                                                                                                                                            |
|        | Cooperate with other hospitals to ensure bed capacity and to seek appropriate level of care             | <p>Coordinate occupancy levels between hospitals in the region to balance load</p> <p>Give coordinating emergency number visibility on hospital occupancy</p> <p>Improve intra-hospital coordination by bringing simpler cases to other hospitals</p> <p>Improve intra-hospital coordination by enabling right level of care</p> <p>Improve intra-hospital coordination by relocating patients to the right hospital with the right level of care</p> <p>Let external actor coordinate and balance the flow of patients to the different hospitals</p> <p>Outsource or hand over simpler care to other hospitals</p> <p>Plan real time for an optimal capacity between nearby hospitals to smooth load</p> <p>Push secondary care to community hospitals</p> <p>The most advanced hospitals cannot be everything to everyone</p> <p>Use alert signs at hospital website to direct ambulances to hospitals with most capacity</p> <p>Use intra-hospital coordination of the bed capacity</p>                                                                                                                                                                                                    |
|        | Reach, inform and treat patients before they seek acute hospital care                                   | <p>Communicating hospital capacity using defined community distribution lists</p> <p>Have a virtual ED before real ED</p> <p>Have hospital off hours 24-7 hotline</p> <p>Make outpatient teams communicate to patients, expectations on ED waiting time</p> <p>Mobile teams meets patients in their homes</p> <p>Prehospital call line secures acute patients are arriving to a hospital with capacity</p> <p>Prehospital has mobile teams who reach and treat patients to avoid hospital care</p> <p>Provide a tele-medicine hospital to support patients at home</p> <p>Send preventive information to the public when capacity is restrained</p> <p>Use an online express care as an initial triage</p> <p>With info on patient google searches, hospitals can reach out to patients at an early stage in their sickness</p>                                                                                                                                                                                                                                                                                                                                                                |
|        | Require increased primary care responsibility and support with more knowledge exchange and coordination | <p>Cooperate and invite primary care doctors to teach them to take more complex patients</p> <p>Coordinate strategically with urgent care providers to avoid ED admissions</p> <p>Educate the GPs in areas where they send too many patients</p> <p>From a societal perspective more care should be given by primary care physicians</p> <p>Help to make primary care physicians take more patients</p> <p>Make GPs write better medical referrals</p> <p>More collaboration with primary care physicians is needed</p> <p>Primary care education and coordination</p> <p>Primary care must have longer opening hours</p> <p>Primary care must have longer opening hours and better availability</p> <p>Primary care need to take more patients</p> <p>Teach the physicians in primary care to treat patients with more complex problems</p> <p>Urgent care plays an important role in offloading the emergency department</p>                                                                                                                                                                                                                                                                 |
|        | Strategic planning: make recurring strategic revisions on fit between demand and capacity               | <p>Build annual makro model on demand and available capacity</p> <p>Central management are involved to strategically look at capacity gaps</p> <p>Central management make quarterly reviews on unused OR capacity</p> <p>Central management strategically looks at capacity gaps</p> <p>Closely monitor demand and capacity to identify misfits for certain disciplines</p> <p>Forecast demand - capacity requirements four times a year</p> <p>Make long term planning on demand and hospital capacity</p> <p>Management takes decisions on employment of critical specialities to fit with demand</p> <p>Reoccurring capacity use problems are solved by the top management</p> <p>Set capacity across hospital based on annual revisions on the need of the community</p> <p>The central operational group studies utilization of outpatient clinics on capacity and backlog</p> <p>The hospital management must handle unresolved issued between the departments</p> <p>Unsolved problems must be taken care of by the top management</p> <p>Use demand forecast models with LoS, market share, to establish occupancy rates</p> <p>Use predictive analytics to right size departments</p> |
|        | Strategic planning: use predictive analytics to forecast demand patterns and capacity needs             | <p>"Seven day hospital"- Use data to identify capacity need all seven days of the week</p> <p>Build predictive views on scenarios for certain plans and demand patterns</p> <p>Create situational awareness by using predictive data to estimate bottlenecks</p> <p>Develop better outpatient frontend analytics</p> <p>Develop predictive analytics to anticipate need of capacity margin</p> <p>Develop predictive analytics to describe likely patient flow and requirements</p> <p>Develop predictive analytics to forecast bottlenecks and overcrowding</p> <p>Develop predictive analytics to have proactive trigger points</p> <p>Develop predictive analytics to optimize staffing</p> <p>Gather patient flow data to understand patterns</p> <p>More predictive analytics could be used for the patient flow through the outpatient clinic</p> <p>Provide forecasted risks concerning planned admissions and discharges</p> <p>Use algorithms to predict capacity need</p> <p>Use better tools to anticipate future demand</p> <p>Work proactively to anticipate problems or bottlenecks</p>                                                                                          |
|        | Use IT-tools and data-analysis for standardized admissions, early assessments and reduced no-shows      | <p>Better time planning can reduce wait for pre-assessments</p> <p>Digital pre-assessments by patients</p> <p>Have a preoperative strategy assessing patient on video or by phone</p> <p>Have a single phone number for each clinic to reduce patient confusion</p> <p>Make patients accountable for outpatient no-shows</p> <p>Reduce variability in ED admittance by visualizing practice variation among clinicians</p> <p>Use robots to read and sort referrals</p> <p>Use standardized referral pathway for efficient handoffs and communication</p>                                                                                                                                                                                                                                                                                                                                                                                                                                                                                                                                                                                                                                      |

| Themes                                                                                               | Solution Categories                                                                                                                                                                                                                                                                                                                                                                                                                                                                                                                                                                                                                                                                                                                                                                                                                                                                                                                                                                                                                                                                                                                                                                                                                   | Open Interview Codes                                                                                                                                                                                                                                                                                                                                                                                                                                                                                                                                                                                                                                                                                                                                                                                                                                                                                                                                                                                                |
|------------------------------------------------------------------------------------------------------|---------------------------------------------------------------------------------------------------------------------------------------------------------------------------------------------------------------------------------------------------------------------------------------------------------------------------------------------------------------------------------------------------------------------------------------------------------------------------------------------------------------------------------------------------------------------------------------------------------------------------------------------------------------------------------------------------------------------------------------------------------------------------------------------------------------------------------------------------------------------------------------------------------------------------------------------------------------------------------------------------------------------------------------------------------------------------------------------------------------------------------------------------------------------------------------------------------------------------------------|---------------------------------------------------------------------------------------------------------------------------------------------------------------------------------------------------------------------------------------------------------------------------------------------------------------------------------------------------------------------------------------------------------------------------------------------------------------------------------------------------------------------------------------------------------------------------------------------------------------------------------------------------------------------------------------------------------------------------------------------------------------------------------------------------------------------------------------------------------------------------------------------------------------------------------------------------------------------------------------------------------------------|
| Internal                                                                                             | Allocate dedicated capacity for both acute and elective patient flows                                                                                                                                                                                                                                                                                                                                                                                                                                                                                                                                                                                                                                                                                                                                                                                                                                                                                                                                                                                                                                                                                                                                                                 | Acute and elective surgery must be separated to not cancel surgery<br>Caps on the OR schedule to secure capacity for acute patients<br>Have acute and planned care on separate floors and within separate surgery divisions<br>Operate acute cases immediately to better use OR and push flow<br>Separate acute and planned surgeries<br>When deciding capacity for elective OR cases, have a sufficient margin for acute cases                                                                                                                                                                                                                                                                                                                                                                                                                                                                                                                                                                                     |
|                                                                                                      | Ensure a high OR-utilization with smart case mixes, all day utilization and quick cancellation refill                                                                                                                                                                                                                                                                                                                                                                                                                                                                                                                                                                                                                                                                                                                                                                                                                                                                                                                                                                                                                                                                                                                                 | Begin with long cases and after short to utilize whole day<br>Count used and unused slots for surgery and appointments to improve utilization<br>Fill schedule from the back<br>For OR use, start early first case on time and optimize changeover times<br>Have a pool of patients on SMS-list to find a patient if a surgery is cancelled<br>Have capacity alerts to bring in patients on the waiting list<br>Improve the OR use after 15 to improve capacity<br>Make the OR staff understand need of flexibility around last case of the day<br>Make the staff understand the need of being flexible around the schedule to finish the cases of the day<br>Plan OR schedule strategically with both long and short cases over the day<br>Plan the OR schedule beginning with the long cases and continue with short later in the day                                                                                                                                                                             |
|                                                                                                      | Have a structured organization for daily problem solving and capacity optimization                                                                                                                                                                                                                                                                                                                                                                                                                                                                                                                                                                                                                                                                                                                                                                                                                                                                                                                                                                                                                                                                                                                                                    | Employ flow engineers to visualize and break bottlenecks<br>Have an operating management team to improve time use, changeover and processes<br>Hospital culture must shift to continuous improvement culture<br>It is important to have a problem solving meeting structure<br>Make change or improvement seen as good and necessary<br>Once a month there is a meeting about the present operations to solve bottlenecks<br>Tactical planning meets once a week to look ahead<br>Team for bottleneck identification<br>Use flow engineers to identify patients choke points                                                                                                                                                                                                                                                                                                                                                                                                                                        |
|                                                                                                      | Improve outpatient processes by implementing standards on schedules and appointments                                                                                                                                                                                                                                                                                                                                                                                                                                                                                                                                                                                                                                                                                                                                                                                                                                                                                                                                                                                                                                                                                                                                                  | Clear outpatient clinic standards on clinic time, start-stop, amount of appointments<br>Have outpatient clinical slot standardization<br>Same speciality clinics should have standardized set ups<br>Standardized physician times per patient in outpatient clinics<br>The outpatient world must become more organized like the inpatient side<br>Use room or template utilization to improve outpatient capacity efficiency                                                                                                                                                                                                                                                                                                                                                                                                                                                                                                                                                                                        |
|                                                                                                      | Improve prioritization schemes and develop standards on procedures, roles and staff-bed ratios                                                                                                                                                                                                                                                                                                                                                                                                                                                                                                                                                                                                                                                                                                                                                                                                                                                                                                                                                                                                                                                                                                                                        | Create clear prioritization lists among work tasks<br>Create flexibility across the hospital by working more with standardization<br>Create standardization with electronic instructions system<br>Greater utilization, lower variability, less staffing flexibility<br>Have a common and standardized coordination of the surgery process<br>Have clear guidelines for prioritizations on when to cancel surgeries<br>Have clear roles and responsibilities<br>Management must set clear prioritization schemes for surgeries of same type when capacity is filled<br>Practice to the top of your license<br>Standardize routes of communication<br>Standardize treatment and reduce artist culture<br>Surgeon puts patient on OR waiting list, head of department decides priority, nurse coordinator schedules the patient<br>Translate volume into resource equivalents to evaluate capacity<br>Use clear nursing ratios per bed, speciality or type of patient<br>Use clear targets for nursing and bed ratios |
|                                                                                                      | Invest in ancillary service capabilities to minimize bottleneck risks in indirect patient                                                                                                                                                                                                                                                                                                                                                                                                                                                                                                                                                                                                                                                                                                                                                                                                                                                                                                                                                                                                                                                                                                                                             | Build lab capacity to deliver lab results at 10 a.m. every day<br>Expand sterile central to improve equipment predictability<br>Invest in diagnostics capacity<br>Need of more radiology capacity                                                                                                                                                                                                                                                                                                                                                                                                                                                                                                                                                                                                                                                                                                                                                                                                                   |
|                                                                                                      | Make all employees understand the importance of having a patient flow focus                                                                                                                                                                                                                                                                                                                                                                                                                                                                                                                                                                                                                                                                                                                                                                                                                                                                                                                                                                                                                                                                                                                                                           | Change culture from personal preferences to flow prioritization<br>Change staffs individual preferences to a flow incentive<br>Individuals must understand the patientflow<br>Make doctors aware of the consequences of their decision on the flow<br>Making staff responsible for the throughput of patients instead of the single activities<br>Show everyone that uninformed capacity decisions can lead to flow inefficiencies<br>Staff must understand implications across processes                                                                                                                                                                                                                                                                                                                                                                                                                                                                                                                           |
|                                                                                                      | Operational planning: have daily capacity meetings within the department or clinic                                                                                                                                                                                                                                                                                                                                                                                                                                                                                                                                                                                                                                                                                                                                                                                                                                                                                                                                                                                                                                                                                                                                                    | Daily meeting on capacity, anticipated ins and outs<br>Daily organizational bed huddles with patient care managers and charge nurses<br>Daily steering with use of input and discharge boards<br>Organize staffing capacity in morning and afternoon to synchronize with demand<br>Reoccurring capacity meetings during the day to solve bottlenecks                                                                                                                                                                                                                                                                                                                                                                                                                                                                                                                                                                                                                                                                |
| Optimize and smooth occupancy rate levels by admitting patients based on length of stay and ICU risk | Base bed occupation on length of stay<br>Base capacity on optimal occupancy rates and estimated demand<br>Base OR case mix on available beds and anticipated LoS<br>Base planned care on anticipated occupancy census level and implications on ED boarding<br>Forecast how beds open up based on estimated LoS<br>Forecast patient mix and LoS to identify necessary beds and staff<br>Improve flow by both building OR schedule on LoS and have fluid caps on ward beds<br>Make the beds evenly full over the week by building OR schedule based on estimated LoS<br>Optimize OR schedule with a mix of specialities to level load occupancy and severeness after surgery<br>Optimize system around capacity usage<br>Optimize the system around the OR use to minimize variation and increase efficiency<br>Plan elective care based on LoS to smooth capacity<br>Set up OR schedule based on likelihood of ICU treatment<br>Show what type and how many patients clinics will have so they understand difficulties of the ICU<br>Use daily risk estimation to decide operations flexibility<br>Use predictive analytics to estimate LoS for optimal scheduling<br>Use predictive analytics to estimate LoS for optimal scheduling |                                                                                                                                                                                                                                                                                                                                                                                                                                                                                                                                                                                                                                                                                                                                                                                                                                                                                                                                                                                                                     |

| Themes          | Solution Categories                                                                                    | Open Interview Codes                                                                                                                                                                                                                                                                                                                                                                                                                                                                                                                                                                                                                                                                                                                                                                                                                                                                                                                                                                                                                                                                                                                                                        |
|-----------------|--------------------------------------------------------------------------------------------------------|-----------------------------------------------------------------------------------------------------------------------------------------------------------------------------------------------------------------------------------------------------------------------------------------------------------------------------------------------------------------------------------------------------------------------------------------------------------------------------------------------------------------------------------------------------------------------------------------------------------------------------------------------------------------------------------------------------------------------------------------------------------------------------------------------------------------------------------------------------------------------------------------------------------------------------------------------------------------------------------------------------------------------------------------------------------------------------------------------------------------------------------------------------------------------------|
| <b>Internal</b> | Schedule staff and all clinical activities based on an optimal utilization of the OR-schedule          | Align flow by adapting OR schedule, clinic schedule and research schedule<br>Build surgeon schedule around OR-efficiency<br>Decrease OR variation by making surgeons prioritize the OR-schedule first<br>Find balance between OR efficiency and surgeon efficiency<br>Identify demand patterns for scheduling<br>Make surgeon plan research, teaching and appointments after whats best for the OR-schedule<br>Plan the staffing schedule well ahead<br>Surgeons must prioritize surgeries before their research                                                                                                                                                                                                                                                                                                                                                                                                                                                                                                                                                                                                                                                            |
|                 | Give clinics trust and improvement autonomy but follow central process metrics and external benchmark  | Benchmark for internal production efficiency<br>Clinics are responsible for mapping out and organizing their beds<br>Clinics independantly set goals and use metrics to reach them<br>Compare standards and ratios to national benchmarks<br>Each outpatient clinic manages the flow within their clinic<br>Efficiency is driven by measuring length of stay metric<br>Identify capacity need by measuring time to finish activities<br>Identify capacity requirements based on internal capacity revisions and external benchmarking<br>Improve lead times with PREM<br>Look at beds available versus beds filled and amount of appointment slots filled<br>Look at internal metrics to ensure internal efficiency<br>Look at surgeon operating time to improve flow<br>The key metric on efficiency is length of stay (LOS)<br>Use detailed follow-ups on metrics for efficiency<br>Use internal process metrics for efficiency                                                                                                                                                                                                                                           |
|                 | Understand the tipping point of hospitals' capacity utilization and ensure sufficient capacity buffers | Define optimal occupancy rates and work towards them<br>Know your tipping point on occupancy and flow<br>Make sure to run below the critical capacity utilization level<br>Measure the use of the ORs closely to be between 80-85%<br>Plan surgical schedule with high margin to avoid peaks<br>Run below the occupancy rate tipping point where efficiency decreases<br>Run below the occupancy rate tipping point where efficiency decreases<br>The limitless demand logic must stop<br>There must be limits to how overcrowded a hospital can become<br>Understand where you have your capacity tipping point                                                                                                                                                                                                                                                                                                                                                                                                                                                                                                                                                            |
|                 | Use external facilities or patient hotels to release hospital bed capacity                             | Have a patient hotel to release capacity<br>have transplant patients living in external facility during treatment<br>Use a patient hotel when the patient is not sick enough to need an inpatient bed<br>Use patient hotel to avoid admitting patients to the hospital                                                                                                                                                                                                                                                                                                                                                                                                                                                                                                                                                                                                                                                                                                                                                                                                                                                                                                      |
|                 | Use more digital tools and new treatment methods to reduce lead times                                  | Create more capacity for ambulatory - day care services<br>Create more possibilities for the day hospital and care in the outpatient departments<br>Digitalization to make care more transparent to patients and staff<br>Have X-rays ordered digitally<br>Invest in new technology to enable less treatment<br>Move treatments from inpatient to outpatient if possible<br>Reduce internal variation locally with data support from central management<br>Transform care into more ambulatory care and build that capacity<br>Use ERAs (enhanced recovery after surgery) to make patients ambulate faster<br>Use shared patient dressing rooms to save time before treatment                                                                                                                                                                                                                                                                                                                                                                                                                                                                                               |
|                 | Use an OR block schedule per clinic and plan cases based on downstream bed availability                | Block schedule for each department and if not used then open up for others<br>Build OR model with expected vacation, sick leave and available beds.<br>Check periodicity to ER volumes and then schedule elective cases to counteract or offset that<br>Create pre-visibility to plan OR schedule based on typology of patients and availability of beds<br>Define flow for different patient groups to optimize whats controllable and balance against the uncontrollable<br>Have a few surgeries per day per department to smooth<br>If beds are filled up then the flow team can prioritize to use OR for ambulatory patients<br>Level load capacity over whole week<br>Maximize use of the OR to level load across week<br>Need for operative scheduling across the services for level loading<br>Postpone an elective case until bed availability is guaranteed<br>Set caps on amount of surgeries according to available beds afterwards to avoid PACU boarding<br>Smooth the OR schedule and postpone cases to next week if OR becomes to busy<br>The scheduled surgeries must better match bed availability<br>Use an OR smoothing target every day for each clinic |
|                 | Utilize as much of the week as possible and staff day and week according to real demand patterns       | Address cultural issues and try to utilize all days capacity<br>Allocate ED staffing resources from 12-16 to 17-22 instead<br>Base length of operating week on demand and impact<br>Create a new compensation system so staff can work outside traditional office hours<br>Have flexible staffing to adapt to peaks and valleys<br>Have more staffing in evenings and on weekends<br>Have physicians on call for decisions<br>have surgeries six days a week to level capacity<br>Improve the use of capacity all through the week. Fridays afternoon, evenings, weekends<br>Increase weekend flow by increasing weekend inpatient procedures<br>Plan clinic for variable occupancy<br>See if physicians can do surgeries in the evenings                                                                                                                                                                                                                                                                                                                                                                                                                                   |

| Themes                   | Solution Categories                                                                                  | Open Interview Codes                                                                                                                                                                                                                                                                                                                                                                                                                                                                                                                                                                                                                                                                                                                                                                                                                                                                                                                                                                                                                                                                                                                                                 |
|--------------------------|------------------------------------------------------------------------------------------------------|----------------------------------------------------------------------------------------------------------------------------------------------------------------------------------------------------------------------------------------------------------------------------------------------------------------------------------------------------------------------------------------------------------------------------------------------------------------------------------------------------------------------------------------------------------------------------------------------------------------------------------------------------------------------------------------------------------------------------------------------------------------------------------------------------------------------------------------------------------------------------------------------------------------------------------------------------------------------------------------------------------------------------------------------------------------------------------------------------------------------------------------------------------------------|
| <b>Management System</b> | Align objectives, metrics and patient data systems (EHR & CRM) across the organization               | <ul style="list-style-type: none"> <li>Coordinate systems more through an aligned EHR</li> <li>Develop an operating model (how to work with flow)</li> <li>Electronic patient journal connects forecasts on patients, where they will end up</li> <li>Have a CRM-system to give same view on patient journey and needs across hospital</li> <li>Have all metrics of the hospital on one board</li> <li>Have doctors employed by the hospital</li> <li>Have only one board of directors</li> <li>Have physicians under same organization</li> <li>Investing in new EHR system to better align organization</li> <li>Systemness by having only one hospital board</li> </ul>                                                                                                                                                                                                                                                                                                                                                                                                                                                                                           |
|                          | Build up flexible hospital-wide capacity to handle peaks or capacity unbalances                      | <ul style="list-style-type: none"> <li>By historical trends try to staff according to when there is demand</li> <li>Have a floating pool of nurses that can work in many different areas</li> <li>Have a special nursing reserve unit with nurses that can be moved around</li> <li>Have staffing resurces for demand peaks</li> <li>Having a pool of flexible staff to support where needed</li> <li>Use a central nursing staffing office to float people between services</li> <li>Use a nursing block to move nurses between clinics</li> <li>Use a surgical short stay unit (SSU)</li> <li>Use interim personnel to handle demand peaks</li> <li>Use more coordinators in evenings, weekends and holidays to have consistent efficiency</li> <li>Use multi-speciality wards for more flexible bed capacity</li> <li>Use non-traditional post anaesthesia care units or PACUs of the hospital is full</li> </ul>                                                                                                                                                                                                                                                 |
|                          | Put patient flow focus on top of the agenda across the hospital, to change the culture               | <ul style="list-style-type: none"> <li>Avoid overcrowding to be able to look ahead and plan the operations</li> <li>Avoid overcrowding to not always have to be in the fire fighting mode</li> <li>Change culture from accepting chaos to working with standards and weekly load balancing</li> <li>Communicate carefully and walk through future state on how to reach it safely</li> <li>Create flow incentives and levers for behavior</li> <li>Create incentives around flow and not only revenue</li> <li>Develop mindset to look across the hospital for capacity</li> <li>Doctors and all employees must be well tied to the hospital to care for the whole process</li> <li>Every employee must work for the whole hospital and the whole patient process</li> <li>Hospital must plan around patient flow and not be provider centric</li> <li>Implement more clinical pathways for better flow</li> <li>Make everyone understand that they have to think about whats before and what comes next</li> <li>Make organization understand that overcrowding counteract flow and revenue</li> <li>Shift culture to support patient flow</li> </ul>               |
|                          | Connect managers and staff across the hospital to break silo mindsets                                | <ul style="list-style-type: none"> <li>Align management across organization</li> <li>Break system silos with a more flat structure</li> <li>Bring all care contacts together to break silo mindset</li> <li>Build management boards to coordinate between departments</li> <li>Connect management teams inpatient - outpatient</li> <li>Gather staff from different disciplines to give them knowledge about each other</li> <li>Managers must represent the hospital before their department</li> <li>Managers need good system understanding</li> <li>Managers should focus on surrounding actors</li> <li>See the whole hospital as a unified resource of beds</li> <li>You need management commitment to change</li> </ul>                                                                                                                                                                                                                                                                                                                                                                                                                                       |
|                          | Ensure sufficient capacity along the whole patient flow when setting objectives to avoid bottlenecks | <ul style="list-style-type: none"> <li>Assure ability of each clinic and visualize capacity use with Power BI</li> <li>Coordinate clinics along patient flow capacity to avoid resource leakage</li> <li>Create capacity by higher throughput, more capacity or less admissions</li> <li>Ensure hospital wide capacity before confirming targets</li> <li>Ensure that there is available capacity all along the flow</li> <li>Have an overcrowding crisis organization for optimal bed placement</li> <li>Plan capacity with margin to avoid overcrowding</li> <li>Plan operating theatres flow by management team</li> <li>Plan the capacity to avoid overcrowding as far as possible</li> <li>Plan the system to avoid overcrowding and back up of processes</li> <li>Set indicative mission and iteratively anchor goals across organization</li> <li>Shake hand on volumes along the flow to secure throughput</li> <li>System wide capacity planning and accountability</li> <li>The PACU can be used when the hospital suffer from overcrowding</li> <li>Use emergency wards that can accomodate patients when there are great suddens demand peaks</li> </ul> |
|                          | Operational planning: have daily capacity meetings with all clinics or departments of the hospital   | <ul style="list-style-type: none"> <li>Daily capacity meetings between flow team and ICUs</li> <li>Daily inflow-outflow coordination with surgery areas</li> <li>Daily meetings with departments on beds, staff and potential transfers of patients</li> <li>Daily morning huddles for patient flow based on command center data template</li> <li>Early operational capacity meeting to see acute flow and decide upon elective cancellations</li> <li>Have a daily coordination meeting to plan the capacity and get visibility</li> <li>Have a lean management approach with daily huddles at unit and hospital level</li> <li>Have daily operational capacity conference</li> <li>Managers at the patient flow department coordinates daily operational meeting with all services</li> <li>The ED leads the daily capacity meeting on how to place patients</li> </ul>                                                                                                                                                                                                                                                                                           |

| Themes                   | Solution Categories                                                                                    | Open Interview Codes                                                                                                                                                                                                                                                                                                                                                                                                                                                                                                                                                                                                                                                                                                                                                                                                                                                                                                                                                                                                                                                                                                                                                                                                                                                                                                                                                                                                      |
|--------------------------|--------------------------------------------------------------------------------------------------------|---------------------------------------------------------------------------------------------------------------------------------------------------------------------------------------------------------------------------------------------------------------------------------------------------------------------------------------------------------------------------------------------------------------------------------------------------------------------------------------------------------------------------------------------------------------------------------------------------------------------------------------------------------------------------------------------------------------------------------------------------------------------------------------------------------------------------------------------------------------------------------------------------------------------------------------------------------------------------------------------------------------------------------------------------------------------------------------------------------------------------------------------------------------------------------------------------------------------------------------------------------------------------------------------------------------------------------------------------------------------------------------------------------------------------|
| <b>Management System</b> | Share and visualize correct data across the organization to make everyone understand flow implications | <p>Create visibility to make staff understand that demand is not infinite and can be managed by systemness</p> <p>Culture can change by having and making everyone believe the numbers</p> <p>Important to create a real time view to avoid misunderstandings and whitewashing</p> <p>Shared visibility creates transparency and breaks silos</p> <p>Shared visibility is needed between outpatient and inpatient settings to facilitate flow</p> <p>Visualize data, logic for change and emotional case for change to improve flow</p> <p>Visualize the annual volume targets per month and per day along the whole chain of care</p> <p>Visualizing for everyone that someone has empty beds helps alot</p>                                                                                                                                                                                                                                                                                                                                                                                                                                                                                                                                                                                                                                                                                                             |
|                          | Tactical planning: have weekly capacity coordination meetings with all clinics of the hospital         | <p>Data supported department management coordination meetings across hospital every week</p> <p>Having OR meeting one week ahead with accurate and real data to optimize planning ability</p> <p>Operational direction provides OR mission two weeks ahead, clinic then assess resources</p> <p>Provide weekly understandable plans to clinics</p>                                                                                                                                                                                                                                                                                                                                                                                                                                                                                                                                                                                                                                                                                                                                                                                                                                                                                                                                                                                                                                                                        |
|                          | Use a flow command center to optimize capacity use and break hospital flow bottlenecks                 | <p>Air traffic control coordinates rooms, admittances and discharges</p> <p>Air traffic control oversees flow and acts on bottlenecks</p> <p>Control rooms gives global picture and visualises and acts on capacity imbalances</p> <p>Coordinating center manages the flow and identifies bottlenecks</p> <p>Coordinating center takes care of administration and documents</p> <p>Coordinating room can see and act on flow bottlenecks</p> <p>Flow department has patient deck list and fills treatment schedule when they see unused capacity</p> <p>Flow department level loads surgeries globally</p> <p>Flow department meets with OR daily to smooth OR cases based on anticipated bottlenecks</p> <p>Flow department optimizes daily utility</p> <p>Have a bed coordination center to optimize capacity and capability</p> <p>Have a physical command center for capacity management, cleaning services and nursing staffing</p> <p>Hospital wide operational coordination service (direction d'operation)</p> <p>Operations command centers are important to have</p> <p>Physicians and flow department give each other awareness of decisions</p> <p>The flow department manages surge beds</p> <p>Use a command center to coordinate beds, staff and bottlenecks</p> <p>Use command center together with aligned EHRs and bed management systems</p> <p>Use command centers like air traffic control rooms</p> |
|                          | Use IT-tools to analyze bed capacity use and provide daily real time visibility on hospital capacity   | <p>Connect bed capacity with staffing resources real time</p> <p>Have a dashboard with available beds and staff for each unit</p> <p>Have good automated systems for statistics is important</p> <p>Have operational metrics on the daily boards</p> <p>Have screens with real time discharges - admittances</p> <p>Provide better insight to bed capacity</p> <p>Provide real-time information to operating leadership</p> <p>Robust real time information about current situation</p> <p>Send out a situational report twice a day</p> <p>Use data analytics to see evaluate capacity in terms of use of beds and appointment slots</p> <p>Use EHR dashboards to tell real time capacity across hospital</p> <p>Use heat maps to see pressure over the week</p> <p>Use heat maps to see where the highest work load is as base for improvements</p>                                                                                                                                                                                                                                                                                                                                                                                                                                                                                                                                                                     |
|                          | Use some type of patient coordinators to see and prioritize the needs and process of the patient       | <p>A nurse patient coordinator has global picture of each department and takes decisions</p> <p>A patient navigator to traffic patients visits and book surgery</p> <p>Command center physician leader and admitting services works close to create smooth transition from ED to ward</p> <p>Flow coordinators to identify reoccurring problems</p> <p>Have multiple groups represented in command centers</p> <p>Have the same coordinator for returning patients</p> <p>Nurses as operating managers in charge of patient flow</p> <p>Nurses in expediting flow role at command center</p> <p>Patient flow specilists coordinates flow</p> <p>Patient navigators needs to have access to all schedules, know patients situation and have access to the EHR</p> <p>Physician or nurse as patient flow officer in command center</p> <p>Senior nurses to coordinate use of bed capacity</p>                                                                                                                                                                                                                                                                                                                                                                                                                                                                                                                               |
|                          | Work with closer collaboration between clinics or departments across the hospital                      | <p>Clinics help each other and move staff between them if someone is sick</p> <p>Complex patients stays at designated ward, simpler patients can be transferred to other wards</p> <p>Cooperate across clinics and identify need of staff</p> <p>Department groupings for shared patient care</p> <p>Good coordination between management groups of the OR, the ICU and the surgical wards</p> <p>Identify partner units to pool capacity</p> <p>If clinic is full then other clinics give beds to patient in joint coordination</p> <p>If overcrowded then keep patients in the PACU to lower pressure on wards</p> <p>It is extra important to coordinate the ED, the ICU and the OR</p> <p>Make wards used to different patients to hospitalize patients in other departments</p> <p>Retake patients to their proper dept. after situational relocation</p> <p>Use the recovery room to create capacity if their is space and availability</p> <p>When the ward is full then find beds in other specialities as long as its safe</p> <p>When ward is full, patients can get a bed at other wards as long as its medically safe</p>                                                                                                                                                                                                                                                                                     |

| Themes          | Solution Categories                                                                                     | Open Interview Codes                                                                                                                                                                                                                                                                                                                                                                                                                                                                                                                                                                                                                                                                                                                                                                                                                                                                                                                                                                                                                                                                                                                                                                |
|-----------------|---------------------------------------------------------------------------------------------------------|-------------------------------------------------------------------------------------------------------------------------------------------------------------------------------------------------------------------------------------------------------------------------------------------------------------------------------------------------------------------------------------------------------------------------------------------------------------------------------------------------------------------------------------------------------------------------------------------------------------------------------------------------------------------------------------------------------------------------------------------------------------------------------------------------------------------------------------------------------------------------------------------------------------------------------------------------------------------------------------------------------------------------------------------------------------------------------------------------------------------------------------------------------------------------------------|
| <b>Transfer</b> | Give specific flow unit or team the task to control and arrange for efficient transfers                 | <p>A coordinating unit can expediate ED transfer when no clinic wants the patient</p> <p>Care practice consultants to coordinate transfer between outpatient practices and the hospital</p> <p>Flow department control beds and the flow of patients</p> <p>Flow department moves patients between services to optimize flow and care</p> <p>Flow team has mandate to move a patient to other ward if there is a free bed</p> <p>Have flow coordinators has strong mandate to optimise the flow of patients</p> <p>Have flow coordinators with strong mandate to optimize flow</p> <p>If clinic can't solve problem locally then flow team finds solution across hospital</p> <p>Internal efficiency by cooperation between respective physician and coordinator</p> <p>Main task of flow team is to get patients out of the ED in 10 hours</p> <p>Patient flow department controls and optimizes use of beds</p> <p>Patient placement department work with flow, admissions, discharge and transfer</p> <p>The patient flow department controls bedflow and everything must go through there</p> <p>Use flow coordinators with strong mandate to optimise the flow of patients</p> |
|                 | Have clear roles with defined mandates concerning transfers between the ED and the receiving clinic     | <p>An internal transport center is responsible for transfer</p> <p>ED decides patient transfer and is responsible until delivery</p> <p>Emergency department identifies the receiving service that then must bring the patient from the ED</p> <p>Improve transfers to not only rely on the management of relationships</p> <p>Physicians admits but nurses control the flow from the ED to services</p> <p>Receiving service cannot object to patient being sent to them</p> <p>The ED has mandate to decide where patients are sent</p> <p>To expediate ED transfer each department has a reference physician at the ED</p> <p>Triage physicians dictates ward placement flexibility for patient</p> <p>Use a pull system to make the wards pull a patient up from the ED when a bed is ready</p>                                                                                                                                                                                                                                                                                                                                                                                 |
|                 | Have standardized handoffs, pre-defined destinations and established incentives for efficient transfers | <p>Create clear view of where ICU patients can be transferred when stabilized</p> <p>Have clear standards and handoff routines between outpatient and inpatient care</p> <p>Have standardized templates for handoffs built into the electronic health record</p> <p>Make transfer handoffs correct and efficient</p> <p>Must be a quick doctor-doctor handoff for efficient transfers</p> <p>Patient transfers depend on good personal communication</p> <p>Use a detailed admission document where algorithm decides service of transfer to avoid any discussion</p> <p>Use of frequency list to expediate transfer from ED to services</p>                                                                                                                                                                                                                                                                                                                                                                                                                                                                                                                                        |
|                 | Use digital tools to efficiently connect, direct and navigate cleaners, porters and ambulatory patients | <p>Create an efficient system on how to notify cleaners to clean empty beds</p> <p>Create the right incentives to transfer patients from the ICU</p> <p>Have an efficient IT-system for patient transfers with connected porters</p> <p>Have an efficient website for patient navigation</p> <p>Provide digital time travelling applications to all patients to expediate transfers</p> <p>Use more cleaningstaff to quickly enable beds before transfer</p>                                                                                                                                                                                                                                                                                                                                                                                                                                                                                                                                                                                                                                                                                                                        |
