# Supplementary material for: Solutions for improved hospital-wide patient flows – a qualitative interview study of leading healthcare providers
Source: PubMed Central journal article supplement (PMC9825009; doi:10.1186/s12913-022-09015-w), 2023-01-07
Supplement: 12913_2022_9015_MOESM3_ESM.pdf [file 12913_2022_9015_MOESM3_ESM.pdf]

## Appendix C:

*The number of hospitals that acknowledges the need to work with a particular solution is categorized from the highest to the lowest number together with the name of the solution and associated theme.*

| Themes                   | Solutions                                                                                               | Hospitals/<br>solution |
|--------------------------|---------------------------------------------------------------------------------------------------------|------------------------|
| <i>Healthcare sector</i> | Increase staffing and bed capacity across the whole healthcare system                                   | 14                     |
| <i>Discharge</i>         | Enable discharge predictability with more home care solutions and own downstream facilities             | 14                     |
| <i>Discharge</i>         | Share objectives, information and real time capacity data with after care services                      | 13                     |
| <i>Internal</i>          | Give clinics trust and improvement autonomy but follow central process metrics and external benchmark   | 11                     |
| <i>Management System</i> | Use a flow command center to optimize capacity use and break hospital flow bottlenecks                  | 11                     |
| <i>Management System</i> | Use IT-tools to analyze bed capacity use and provide daily real time visibility on hospital capacity    | 11                     |
| <i>Discharge</i>         | Have dedicated discharge coordinators or coordinating teams                                             | 11                     |
| <i>Discharge</i>         | Prioritize activities and organize staff to ensure early and efficient daily discharges                 | 10                     |
| <i>Discharge</i>         | Set early discharge goals and work towards them along the patients' whole hospital journey              | 10                     |
| <i>Entry</i>             | Require increased primary care responsibility and support with more knowledge exchange and coordination | 10                     |
| <i>Entry</i>             | Strategic planning: make recurring strategic revisions on fit between demand and capacity               | 10                     |
| <i>Entry</i>             | Strategic planning: use predictive analytics to forecast demand patterns and capacity needs             | 10                     |
| <i>Internal</i>          | Improve prioritization schemes and develop standards on procedures, roles and staff-bed ratios          | 10                     |
| <i>Internal</i>          | Optimize and smooth occupancy rate levels by admitting patients based on length of stay and ICU risk    | 10                     |
| <i>Internal</i>          | Understand the tipping point of hospitals' capacity utilization and ensure sufficient capacity buffers  | 10                     |
| <i>Internal</i>          | Use an OR block schedule per clinic and plan cases based on downstream bed availability                 | 10                     |
| <i>Management System</i> | Build up flexible hospital-wide capacity to handle peaks or capacity unbalances                         | 10                     |
| <i>Management System</i> | Ensure sufficient capacity along the whole patient flow when setting objectives to avoid bottlenecks    | 10                     |
| <i>Management System</i> | Use some type of patient coordinators to see and prioritize the needs and process of the patient        | 10                     |
| <i>Transfer</i>          | Give specific flow unit or team the task to control and arrange for efficient transfers                 | 10                     |
| <i>Entry</i>             | Reach, inform and treat patients before they seek acute hospital care                                   | 10                     |
| <i>Internal</i>          | Ensure a high OR-utilization with smart case mixes, all day utilization and quick cancellation refill   | 9                      |
| <i>Internal</i>          | Use more digital tools and new treatment methods to reduce lead times                                   | 9                      |
| <i>Internal</i>          | Utilize as much of the week as possible and staff day and week according to real demand patterns        | 9                      |
| <i>Management System</i> | Connect managers and staff across the hospital to break silo mindsets                                   | 9                      |
| <i>Management System</i> | Put patient flow focus on top of the agenda across the hospital, to change the culture                  | 9                      |
| <i>Discharge</i>         | Request and work towards increased responsibility from after care services                              | 8                      |
| <i>Discharge</i>         | Use mutual staffing collaboration between the hospital and after care services                          | 8                      |
| <i>Entry</i>             | Cooperate with other hospitals to ensure bed capacity and to seek appropriate level of care             | 8                      |
| <i>Entry</i>             | Use IT-tools and data-analysis for standardized admissions, early assessments and reduced no-shows      | 8                      |
| <i>Internal</i>          | Schedule staff and all clinical activities based on an optimal utilization of the OR-schedule           | 8                      |
| <i>Management System</i> | Work with closer collaboration between clinics or departments across the hospital                       | 8                      |
| <i>Transfer</i>          | Have standardized handoffs, pre-defined destinations and established incentives for efficient transfers | 8                      |
| <i>Discharge</i>         | Increase prioritization of discharge ready patients when planning procedures and activities             | 8                      |
| <i>Discharge</i>         | Provide follow up appointments at discharge to ensure accountability and continuity                     | 7                      |
| <i>Entry</i>             | Ensure capability to reroute less severe ED patients to outpatient or ambulatory care                   | 7                      |
| <i>Internal</i>          | Have a structured organization for daily problem solving and capacity optimization                      | 7                      |
| <i>Management System</i> | Operational planning: have daily capacity meetings with all clinics or departments of the hospital      | 7                      |
| <i>Transfer</i>          | Have clear roles with defined mandates concerning transfers between the ED and the receiving clinic     | 7                      |
| <i>Transfer</i>          | Use digital tools to efficiently connect, direct and navigate cleaners, porters and ambulatory patients | 7                      |
| <i>Internal</i>          | Make all employees understand the importance of having a patient flow focus                             | 7                      |
| <i>Internal</i>          | Operational planning: have daily capacity meetings within the department or clinic                      | 7                      |
| <i>Management System</i> | Align objectives, metrics and patient data systems (EHR & CRM) across the organization                  | 6                      |
| <i>Healthcare sector</i> | Create healthcare system alignment with clear goals and objectives for each healthcare actor            | 6                      |
| <i>Internal</i>          | Improve outpatient processes by implementing standards on schedules and appointments                    | 6                      |
| <i>Management System</i> | Share and visualize correct data across the organization to make everyone understand flow implications  | 5                      |
| <i>Management System</i> | Tactical planning: have weekly capacity coordination meetings with all clinics of the hospital          | 5                      |
| <i>Internal</i>          | Allocate dedicated capacity for both acute and elective patient flows                                   | 4                      |
| <i>Internal</i>          | Invest in ancillary service capabilities to minimize bottleneck risks in indirect patient activities    | 4                      |
| <i>Internal</i>          | Use external facilities or patient hotels to release hospital bed capacity                              | 4                      |
